# Supplementary material for: Terpene Synthase-b and Terpene Synthase-e/f Genes Produce Monoterpenes for Phalaenopsis bellina Floral Scent
Source: PubMed Central journal article supplement (PMC8318001; doi:10.3389/fpls.2021.700958), 2021-07-14
Supplement: Data_Sheet_2.pdf [file Data_Sheet_2.pdf]

**Supplementary Table S1** Information of *TPS* genes used for phylogenetic analysis in Fig. 1.

|         | <b>Name</b> | <b>Accession number</b>  | <b>Species</b>                      |
|---------|-------------|--------------------------|-------------------------------------|
| TPS-b   | PATC139978  | -                        | <i>Phalaenopsis aphrodite</i>       |
|         | PATC127710  | -                        | <i>Phalaenopsis aphrodite</i>       |
|         | PATC150554  | -                        | <i>Phalaenopsis aphrodite</i>       |
|         | PbTPS5      | MW645242                 | <i>Phalaenopsis bellina</i>         |
|         | PbTPS7      | MW645243                 | <i>Phalaenopsis bellina</i>         |
|         | PbTPS9      | MW645244                 | <i>Phalaenopsis bellina</i>         |
|         | PbTPS10     | MW645245                 | <i>Phalaenopsis bellina</i>         |
|         | FhLin       | AFP23421.1               | <i>Freesia hybrid cultivar</i>      |
|         | VvPNRLin    | ADR74209.1               | <i>Vitis vinifera</i>               |
|         | MdOCS-RG1   | AGB14628.1               | <i>Malus domestica</i>              |
|         | SITPS38     | AEP82768.1               | <i>Solanum lycopersicum</i>         |
|         | VvaTerP     | NP_001268216.1           | <i>Vitis vinifera</i>               |
|         | PmIspS      | AAQ84170.1               | <i>Pueraria montana var. lobata</i> |
|         | PtIspS      | AAQ16588.1               | <i>Populus tremuloides</i>          |
|         | MdRGAFS1    | AAX19772.1               | <i>Malus domestica</i>              |
| PcAFS1  | AAT70237.1  | <i>Pyrus communis</i> L. |                                     |
| TPS-e/f | PbTPS3      | MW645240                 | <i>Phalaenopsis bellina</i>         |
|         | PbTPS4      | MW645241                 | <i>Phalaenopsis bellina</i>         |
|         | OsDTC2/KS8  | XP_015617513.1           | <i>Oryza sativa</i>                 |
|         | OsDTC1/KS7  | BAC56714.1               | <i>Oryza sativa</i>                 |
|         | SITPS24/KS  | AEP82778.1               | <i>Solanum lycopersicum</i>         |
|         | MdRGEKS     | AFG18184.1               | <i>Malus domestica</i>              |
|         | LnTPS3      | AKQ19359.1               | <i>Laurus nobilis</i>               |
|         | AdAFS1      | ACO40485.1               | <i>Actinidia deliciosa</i>          |
|         | VvPNENerGl  | ADR74220.1               | <i>Vitis vinifera</i>               |
|         | PdTPS       | XP_017696375.1           | <i>Phoenix dactylifera</i>          |

**Supplementary Table S2** Information of *TPS* genes used for phylogenetic analysis in Supplementary Fig. S1.

| Subfamily | Name       | Accession No.  | Species                                    | Function/Product                                                     |
|-----------|------------|----------------|--------------------------------------------|----------------------------------------------------------------------|
| TPS-b     | FhLin      | AFP23421.1     | <i>Freesia hybrid</i> cultivar             | linalool                                                             |
|           | VvPNRLin   | ADR74209.1     | <i>Vitis vinifera</i>                      | (3R)-linalool                                                        |
|           | MdOCS-RG1  | AGB14628.1     | <i>Malus domestica</i>                     | ( <i>E</i> )- $\beta$ -ocimene                                       |
|           | SITPS38    | AEP82768.1     | <i>Solanum lycopersicum</i>                | $\alpha$ -bergamotene                                                |
|           | VvaTerP    | NP_001268216.1 | <i>Vitis vinifera</i>                      | (-)-alpha-terpineol                                                  |
|           | PmIspS     | AAQ84170.1     | <i>Pueraria montana</i> var. <i>lobata</i> | isoprene                                                             |
|           | PtIspS     | AAQ16588.1     | <i>Populus tremuloides</i>                 | isoprene                                                             |
|           | MdRGAFS1   | AAX19772.1     | <i>Malus domestica</i>                     | ( <i>E,E</i> )-a-farnesene                                           |
|           | PcAFS1     | AAT70237.1     | <i>Pyrus communis</i> L.                   | ( <i>E,E</i> )-a-farnesene                                           |
| TPS-g     | AmMyr      | AAO41727.1     | <i>Antirrhinum majus</i>                   | myrcene                                                              |
|           | AtTPS14    | NP_176361.2    | <i>Arabidopsis thaliana</i>                | (3S)-linalool                                                        |
|           | GmNES      | AEE92791.1     | <i>Glycine max</i>                         | nerol                                                                |
|           | ZmTPS2     | NP_001105854.1 | <i>Zea mays</i>                            | linalool, ( <i>E</i> )-nerolidol, and ( <i>E,E</i> )-geranyllinalool |
| TPS-a     | Cstps1     | AAQ04608.1     | <i>Citrus sinensis</i>                     | valencene                                                            |
|           | MdGDS-RG1  | AGB14625.1     | <i>Malus domestica</i>                     | germacrene-D                                                         |
|           | SITPS12    | AEP82783.1     | <i>Solanum lycopersicum</i>                | $\beta$ -caryophyllene and $\alpha$ -humulene                        |
|           | NtEAS      | AFJ04408.1     | <i>Nicotiana tabacum</i>                   | 5-epi-aristolochene                                                  |
|           | EhTPS      | XP_010910563.1 | <i>Elaeis guineensis</i>                   | —                                                                    |
| TPS-c     | OsCyc2     | BAD42452.1     | <i>Oryza sativa</i>                        | ent-copalyl diphosphate                                              |
|           | SITPS41    | AEP82765.1     | <i>Solanum lycopersicum</i>                | Unknown                                                              |
|           | SrCPS      | AAB87091.1     | <i>Stevia rebaudiana</i>                   | ent-copalyl diphosphate                                              |
| TPS-e/f   | OsDTC2/KS8 | XP_015617513.1 | <i>Oryza sativa</i>                        | stemar-13-ene                                                        |
|           | OsDTC1/KS7 | BAC56714.1     | <i>Oryza sativa</i>                        | ent-cassa-12,15-diene                                                |
|           | SITPS24/KS | AEP82778.1     | <i>Solanum lycopersicum</i>                | ent-kaurene                                                          |
|           | MdRGEKS    | AFG18184.1     | <i>Malus domestica</i>                     | ent-kaurene                                                          |
|           | LnTPS3     | AKQ19359.1     | <i>Laurus nobilis</i>                      | geranyllinalool                                                      |
|           | AdAFS1     | ACO40485.1     | <i>Actinidia deliciosa</i>                 | ( <i>E,E</i> )-a-farnesene                                           |
|           | VvPNENerGl | ADR74220.1     | <i>Vitis vinifera</i>                      | ( <i>E</i> )-Nerolidol and ( <i>E,E</i> )-Geranyl linalool syn       |
|           | PdTPS      | XP_017696375.1 | <i>Phoenix dactylifera</i>                 | —                                                                    |

### Supplementary Figure legends

**Supplementary Figure S1.** (A) Phylogenetic analysis of the subfamilies of putative *TPS* genes with *TPS* genes identified from other species (detailed information in Supplemental Table 2). *TPS* genes from *P. bellina* are in bold black and from *P. aphrodite* in bold grey. Bootstrap values were calculated as a percentage of 1000 replicates, with values > 50 shown. The scale bar represents 0.2 substitutions per site. (B) Comparative gene expression analysis using heatmap analysis of *TPS* genes in transcriptomic data for blooming day (Dd), 3 days post-anthesis (D+3), D+5 and D+13 in *P. bellina* and microarray data for bud and flower in *P. aphrodite*. Hierarchical clustering was performed by the centroid linkage method with uncentered correlation. The heatmap and dendrogram of the clustered data were visualized by using Java TreeView (2.11) (Freudenberg et al., 2009). The color scale ranged from red (highest expression) to white to green (lowest expression).

**Supplementary Figure S2.** Plant morphology for (A) *P. bellina* and (B) *P. I-Hsin Venus*. *P. bellina* has strong floral scent but has one flower in the spike at one time, while *P. I-Hsin Venus* has less scent but is floriferous.

**Supplementary Figure S3.** An alternative-splicing model was proposed to account for the appearance of pre-stop MTPS transcripts, PbTPS5-2 and PbTPS10-1. Gene structure analysis of *PbTPS5* and *PbTPS10* showed that both genes contain one normal transcript and one pre-stop transcript, which might result from intron retention because of alternative splicing. TSS, transcription start site.

**Supplementary Figure S4.** Phylogenetic analysis of *Clarkia* linalool synthase (in blue dots) and *PbTPS3*, *PbTPS4* and other plants terpene synthases. Sequence analysis was performed with MEGA5 to create a tree using the nearest neighbor-joining method. The numbers at each node represent the bootstrap values. The accession numbers of sequences used are as follows: *Perilla frutescens* limonene synthase (AAG31438.1), *Gossypium arboretum* cadinene synthase (CAA65289.1), *Cucurbita maxima* entkaurene synthase (AAB39482.1), *Clarkia breweri* S-linalool synthase (AAC49395.1), *Gossypium hirsutum* cadinene synthase (AAC12784.1), *Citrus limon* gama-terpinene synthase (AAM53943.1), *Citrus limon* limonene synthase 2 (AAM53946.1), *Pisum sativum* copalyl diphosphate synthase (AAB58822.1), *Mentha aquatic* linalool synthase (AAL99381.1), *Abies grandis* pinene synthase (AAB71085.1), *Abies grandis* limonene synthase (AAB70907.1), *Mtntha piperita* farnesene synthase (AAB95209.1), *Solanum lycopersicum* germacrene C synthase (AAC39432.1), *Salvia officinalis* cineole synthase (AAC26016.1), *Salvia officinalis* bornyl diphosphate synthase (AAC26017.1), *Salvia officinalis* sabinene synthase (AAC26018.1), *Cinnamomum tenuipile* geraniol synthase (CAD29734.2), *Mentha spicata* limonene synthase (AAC37366.1), *Clarkia concinna* linalool synthase (AAD19839.1), *Clarkia breweri*

linalool synthase 2 (AAD19840.1), *Nicotiana tabacum* aristolochene synthase (AAA19216.1), *Arabidopsis thaliana* copalyl diphosphate synthase (AAA53632.1), *Zea mays* copalyl diphosphate synthase (AAA73960.1), *Gossypium arboreum* cadinene synthase (AAD51718.1), *Artemisia annua* linalool synthase (AAF13356.1), *Abies grandis* phellandrene synthase (AAF61453.1), *Abies grandis* terpinolene synthase (AAF61454.1), *Abies grandis* limonene/pinene synthase (AAF61455.1), *Arabidopsis thaliana* geranylinalool synthase (Q93YV0.1), *Actinidia deliciosa* ocimene/farnesene synthase (ACO40485.1), *Oryza sativa* Japonica Group linalool synthase (ACF05530.1), *Solanum lycopersicum* terpene synthase (AEP82769.1), *Solanum lycopersicum* linalool/nerolidol synthase (AEP82767.1), *Antirrhinum majus* ocimene synthase (AAO42614.1), *Antirrhinum majus* myrcene synthase (AAO41727.1), *Arabidopsis thaliana* terpene synthase 14 (NP\_001185286.1), *Medicago truncatula* chloroplast terpene synthase 3 (AAV36466.1), *Glycine max* nerol synthase (AEE92791.1), *Medicago truncatula* terpenoid synthase (ABE80305.1), and *Medicago truncatula* terpenoid synthase (ABE91630.1).

**Supplementary Figure S5.** (A) GC-MS of *N. tabacum* transiently overexpressing *PbTPS5* and *PbTPS10* with or without *PbGDPS*. (B) Quantification of tetrahydromyrcenol detected in various experiments. (C) The peaks labeled in (A) are as follows: 1: Tetrahydromyrcenol; 2: Nonanol; 3: Decanal; 4: Ethyl-hexanol; 5: Dodecene; 6: Decene.

**Supplementary Figure S6.** VOCs detected in flowers of (A) *P. aphrodite* and (B) *P. Sogo Yukidian 'V3'* overexpressing various genes, and internal non-volatile terpenoids in flowers of (C) *P. aphrodite*, and (D) *P. Sogo Yukidian 'V3'* overexpressing various genes. Different numbers show the different independent line.

**Supplementary Figure S7.** Functional characterization of purified recombinant proteins of *PbTPS3* and *PbTPS4* with FDP and GGDP added as the substrates. (A) *PbTPS3*+FDP, (B) *PbTPS3*+GGDP, (C) *PbTPS4*+FDP, and (D) *PbTPS4*+GGDP, and No monoterpene products were detected in any reactions.

**Supplementary Figure S8.** Multiple alignment of amino acid sequences of the *TPS-e/f* subfamily of *P. equestris*, *P. bellina* and other plants. *PbTPS3* and *PbTPS4* from *P. bellina*, *LIS* from *C. concinna*, *LIS2* from *C. concinna*, *S-LIS* from *C. breweri*, *AFS1* from *A. deliciosa*, and *GES* from *A. thaliana*. The red boxes indicate the three conserved motifs of DDXXD and NSE/DTE, respectively. The red line is the conifer diterpene internal sequence (CDIS). *PbTPS3* and *PbTPS4* share 62.4% identity.

**Supplementary Figure S9.** (A) Expression of *PbTPS3* vegetative organs with high expression in leaf but very low expression in root and stalk. (B) VOCs emitted from leaf were mostly ( $\beta$ )-cis-ocimene. (C) Structure of ( $\beta$ )-cis-ocimene.

**Supplementary Figure S10.** The binding domains of plant defense transcription factor on the promoter sequences of *PbTPS3* and *PbTPS4*. (A) The gene promoter was indicated as 2,000 bp upstream from the translation start site. (B) WBOXATNPR1 is marked with a blue box, and WRKY71OS is marked with a green box.

**(A)**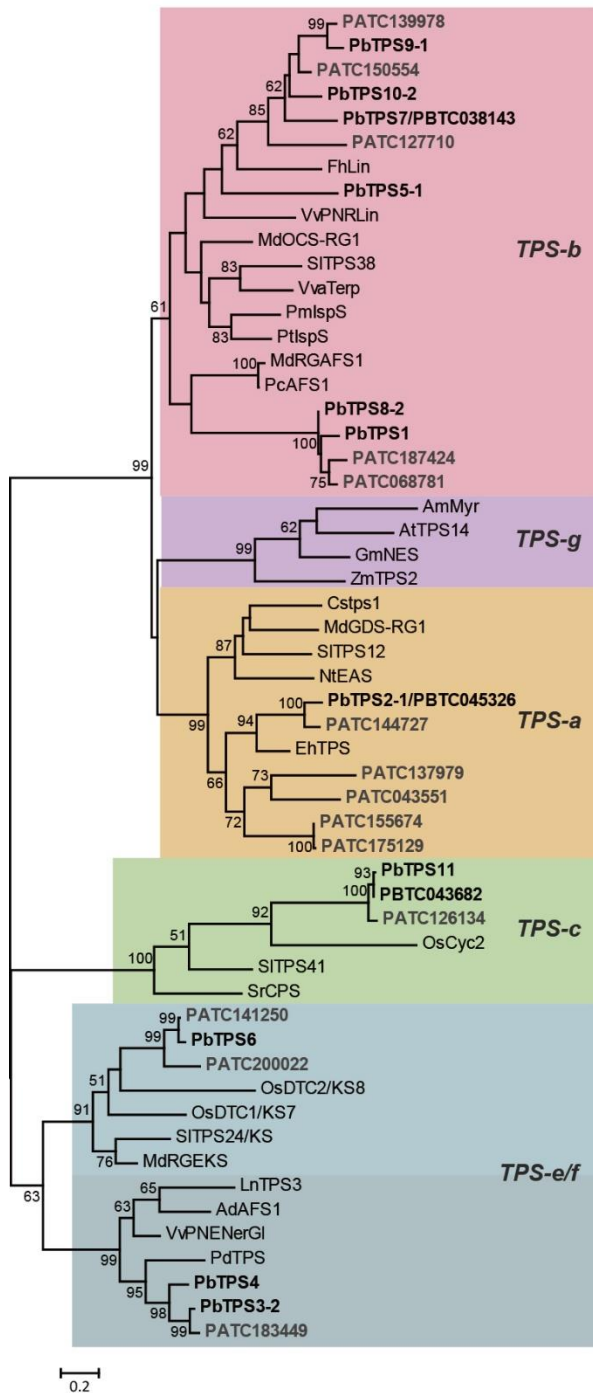**(B)**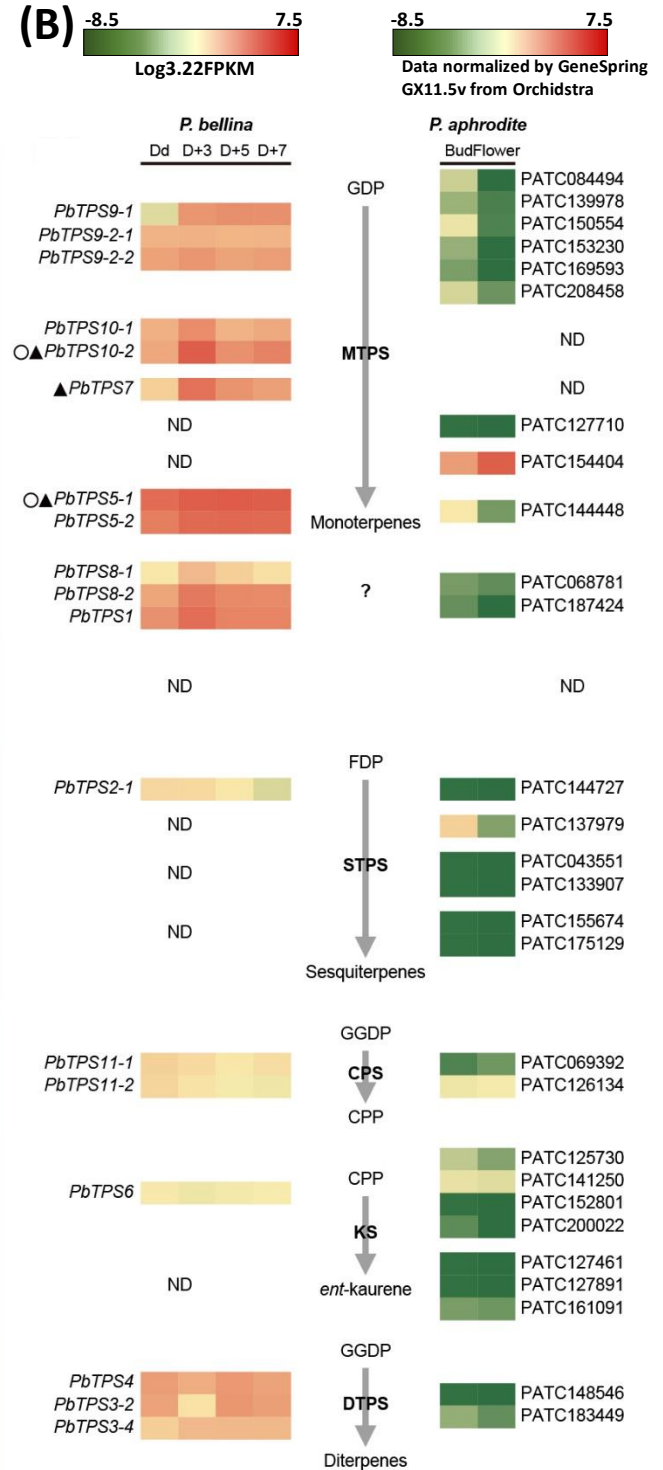

Huang *et al.*, Supplementary Figure S1

**(A)**

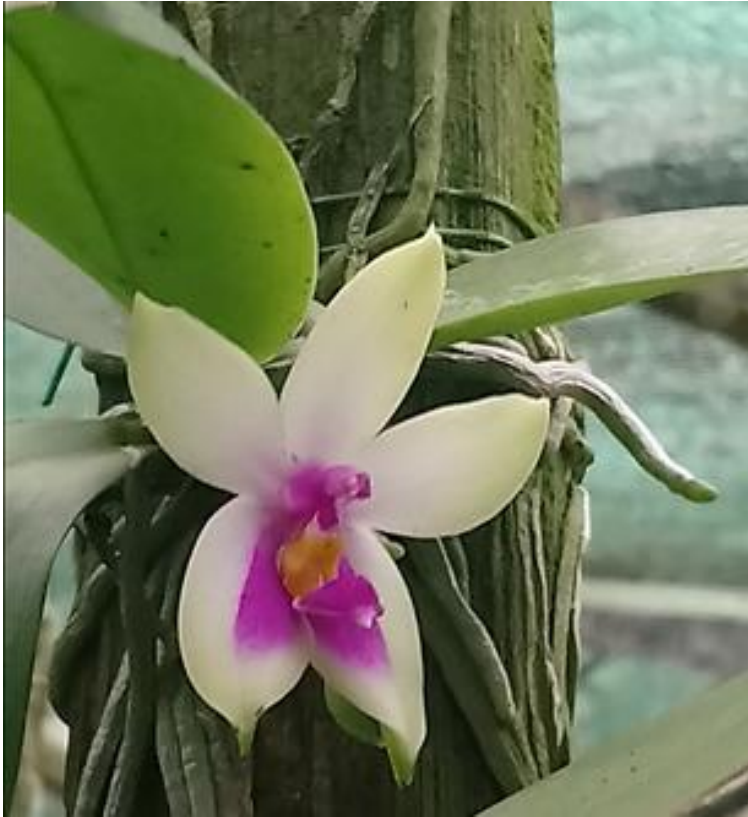

**(B)**

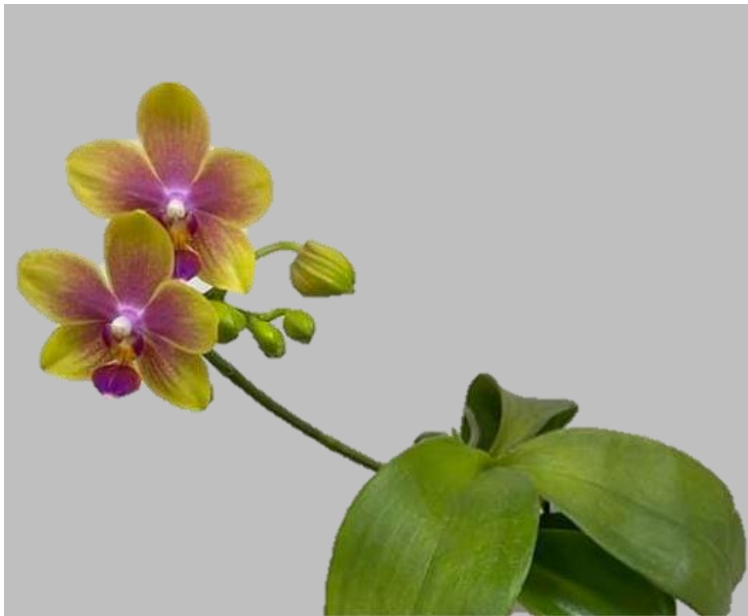

Huang *et al.*, Supplementary Figure S2

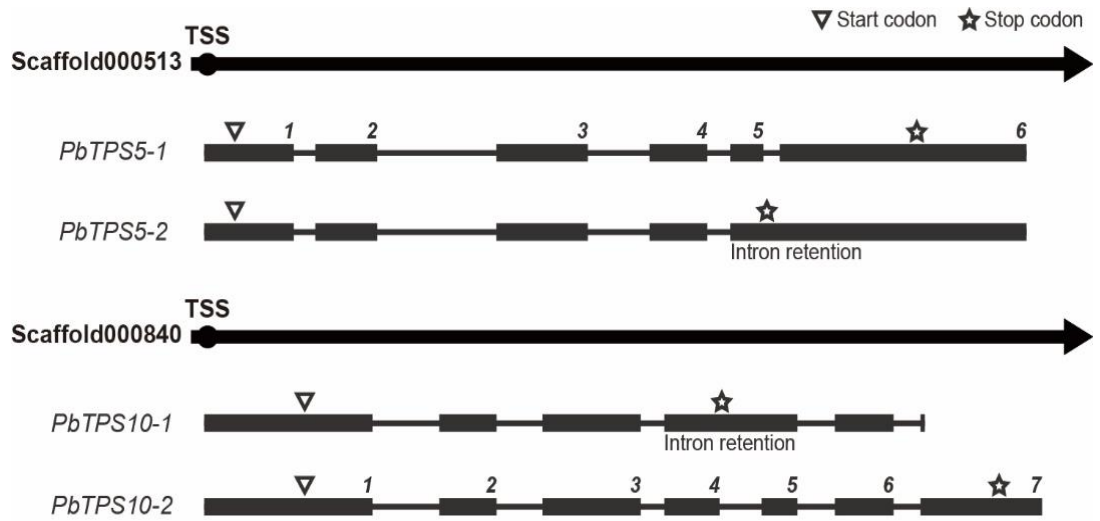

Huang *et al.*, Supplementary Figure S3



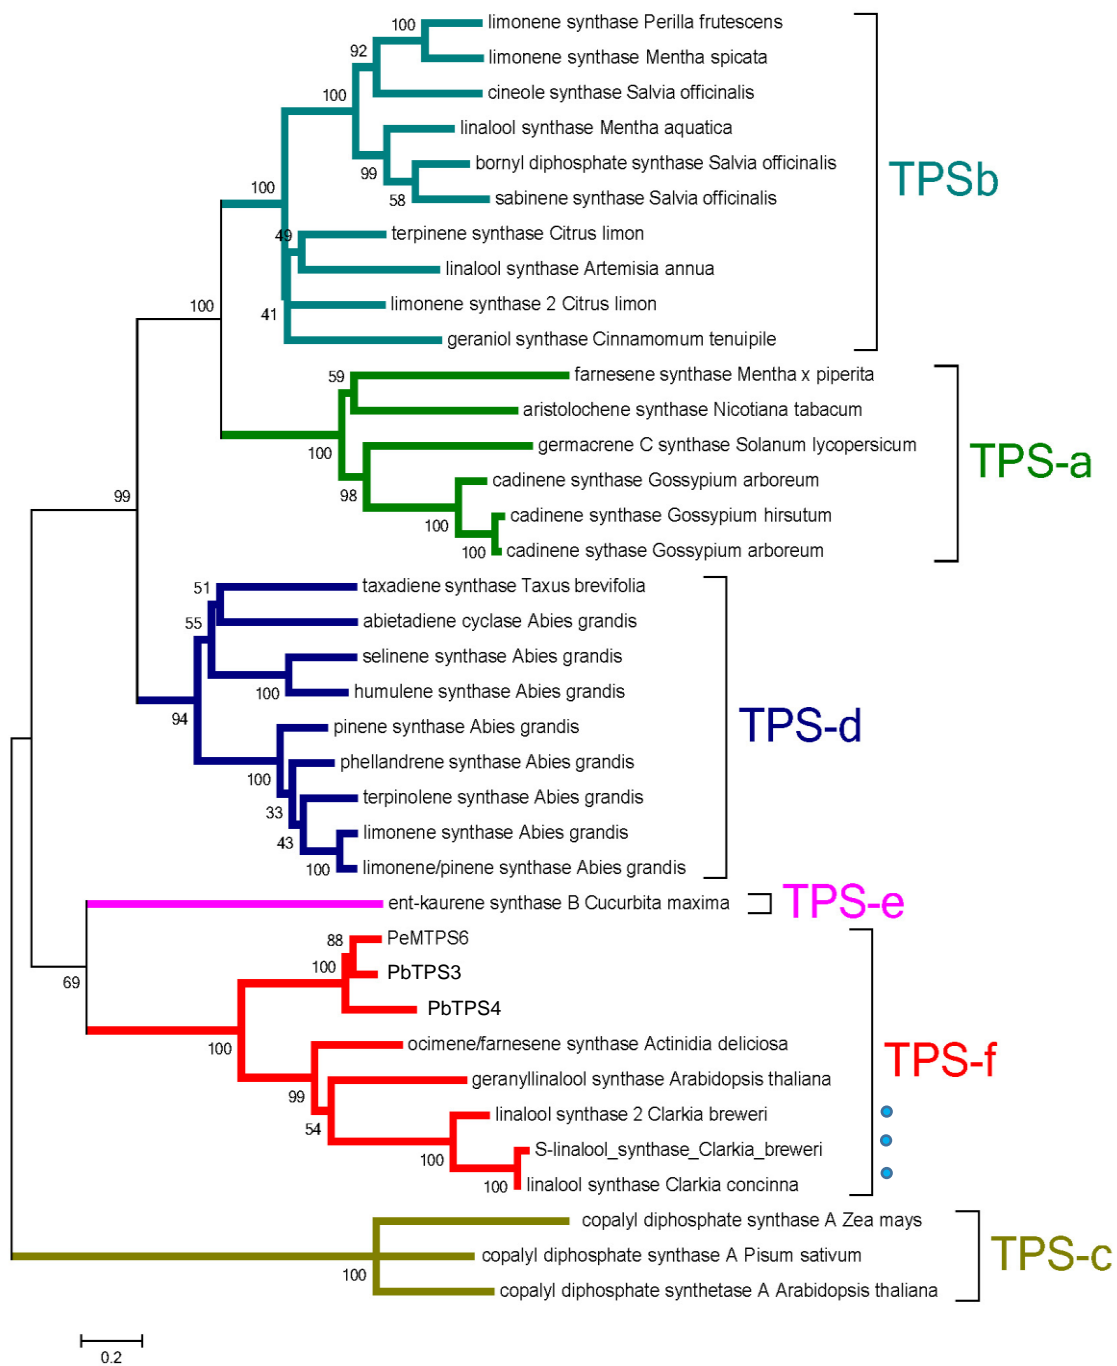

Huang *et al.*, Supplementary Figure S4

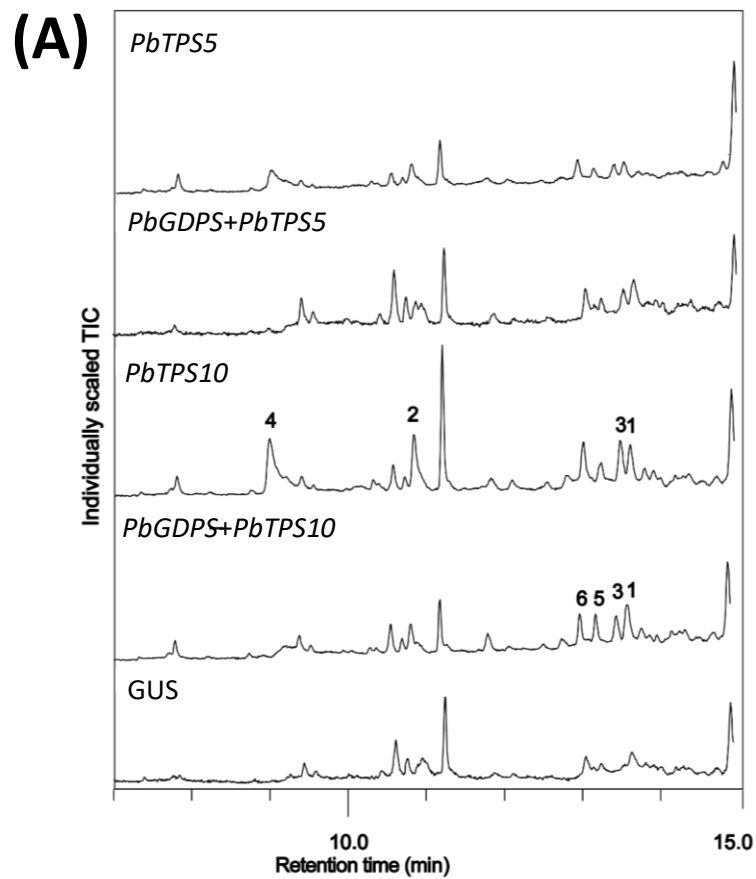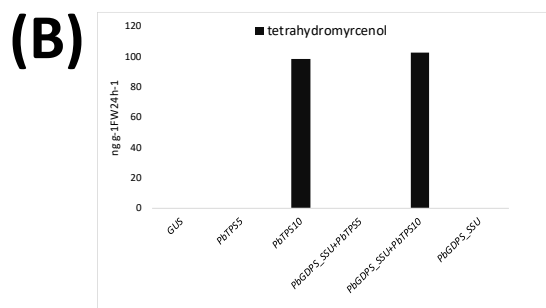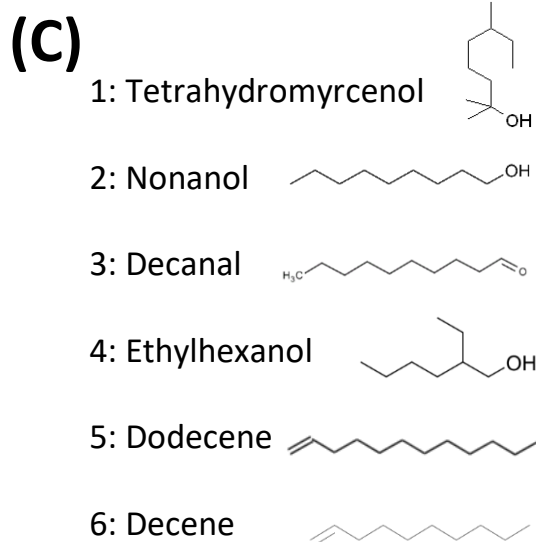

Huang *et al.*, Supplementary Figure S5

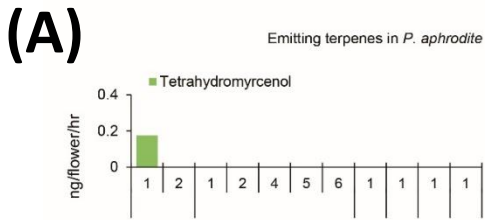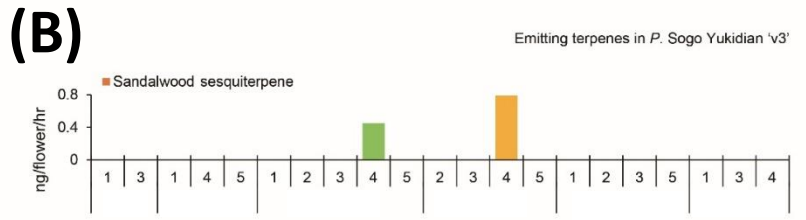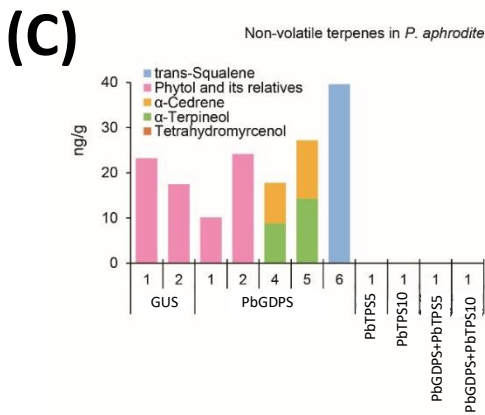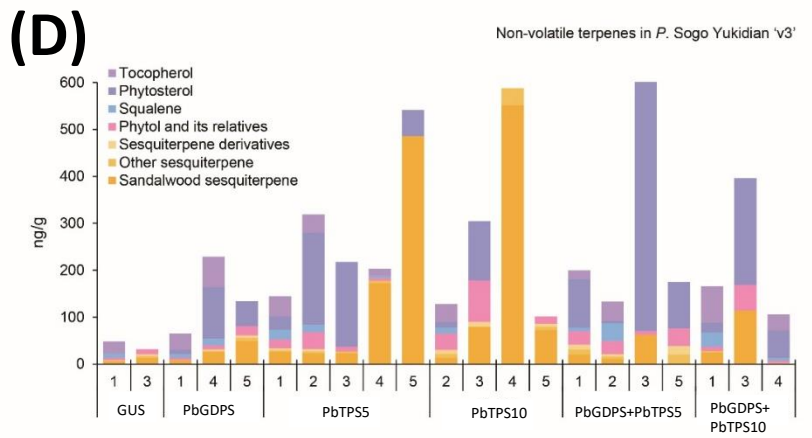

Huang *et al.*, Supplementary Figure S6

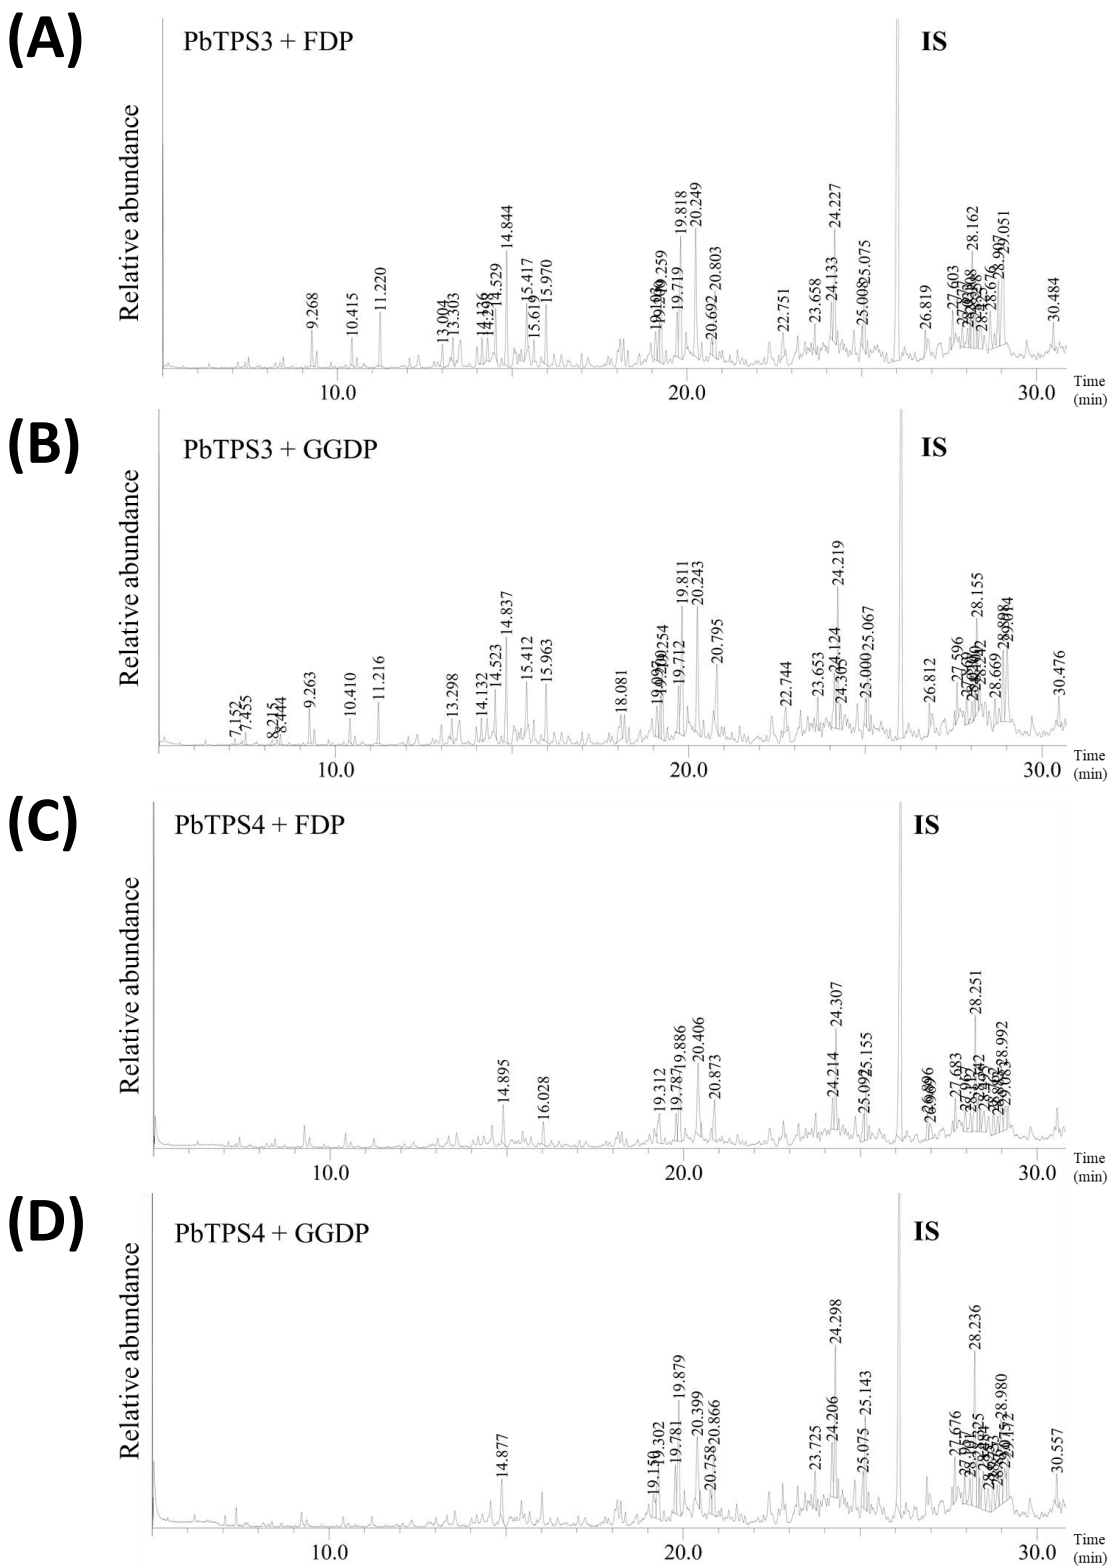

Huang *et al.*, Supplementary Figure S7

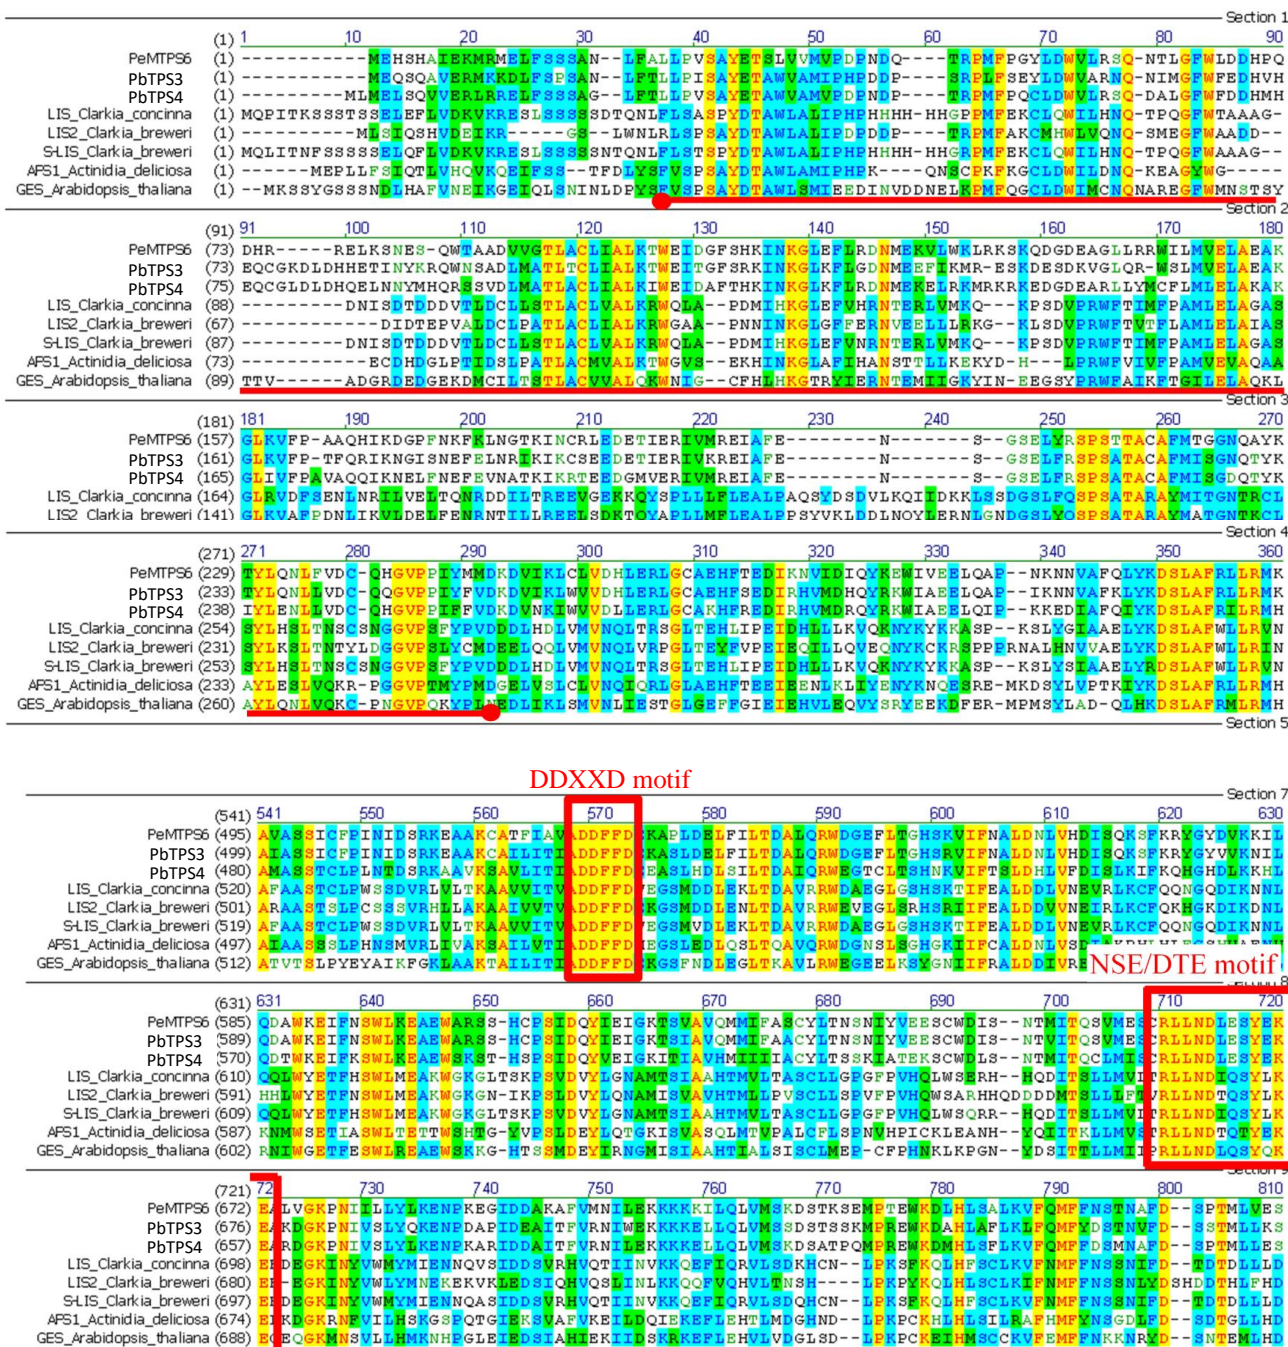

Huang et al., Supplementry Figure S8

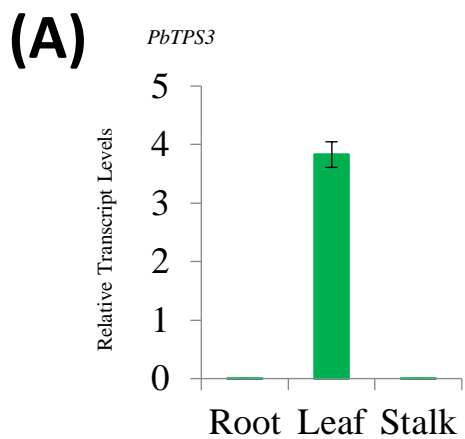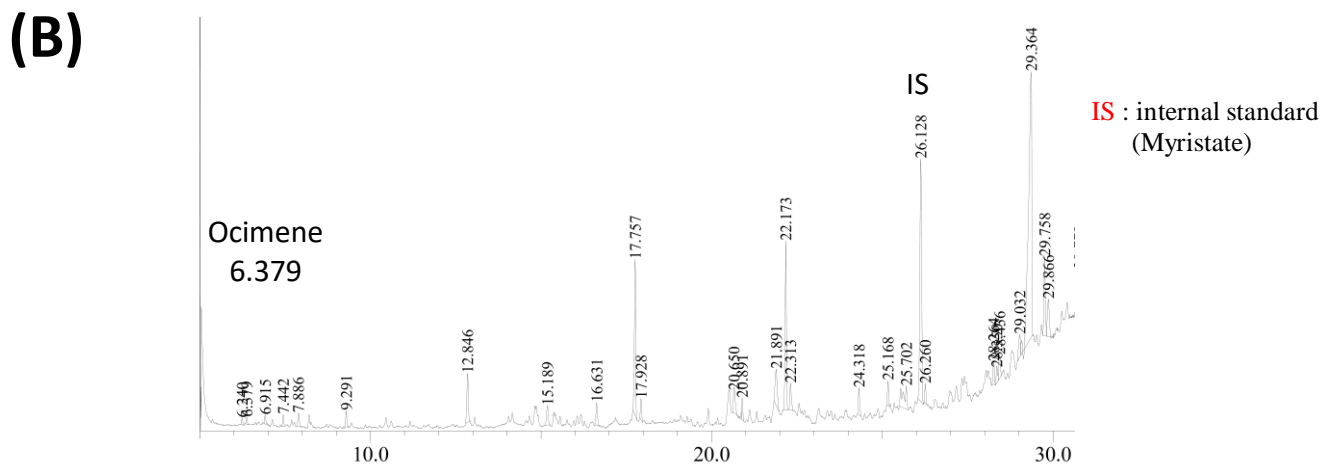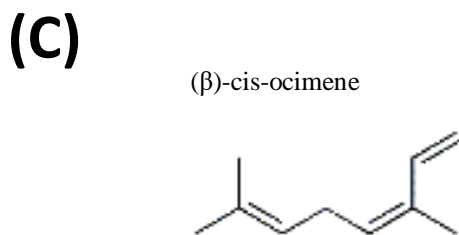

**(A)**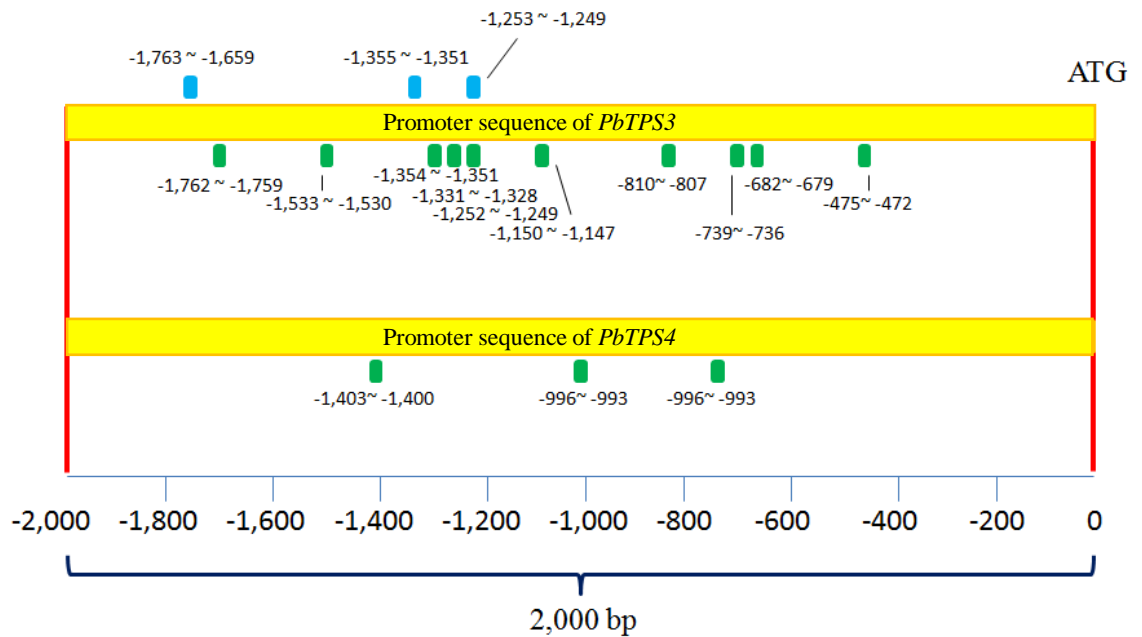**(B)**

| Domain name | Sequence | Function                                                     |
|-------------|----------|--------------------------------------------------------------|
| WBOXATNPR1  | TTGAC    | Specifically by salicylic acid (SA)-induced WRKY DNA binding |
| WRKY71OS    | TGAC     | Early nuclear events in plant defence signalling             |

Huang *et al.*, Supplementary Figure S10
